# Supplementary material for: Intravenous methylprednisolone pulses in hospitalised patients with severe COVID-19 pneumonia: a double-blind, randomised, placebo-controlled trial
Source: PubMed Central journal article supplement — Eur Respir J. 2022 Oct 20;60(4):2200025. doi: 10.1183/13993003.00025-2022 (PMC8971731; doi:10.1183/13993003.00025-2022), 2022-10-20
Supplement: ERJ-00025-2022.Shareable.pdf [file ERJ-00025-2022.Shareable.pdf]

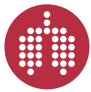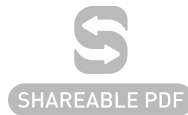

# Intravenous methylprednisolone pulses in hospitalised patients with severe COVID-19 pneumonia: a double-blind, randomised, placebo-controlled trial

Carlo Salvarani<sup>1,2,30</sup>, Marco Massari<sup>3,30</sup>, Massimo Costantini<sup>4</sup>, Domenico Franco Merlo<sup>5</sup>, Gabriella Lucia Mariani<sup>5</sup>, Pierluigi Viale<sup>6</sup>, Stefano Nava<sup>7</sup>, Giovanni Guaraldi<sup>8</sup>, Giovanni Dolci<sup>8</sup>, Luca Boni<sup>9</sup>, Luisa Savoldi<sup>5</sup>, Paolo Bruzzi<sup>9</sup>, Caterina Turrà<sup>10</sup>, Mariagrazia Catanoso<sup>1</sup>, Anna Maria Marata<sup>11</sup>, Chiara Barbieri<sup>12</sup>, Annamaria Valcavi<sup>10</sup>, Francesca Franzoni<sup>5</sup>, Silvio Cavuto<sup>5</sup>, Giorgio Mazzi<sup>13</sup>, Romina Corsini<sup>3</sup>, Fabio Trapani<sup>6</sup>, Alessandro Bartoloni<sup>14,15</sup>, Emanuela Barisione<sup>16</sup>, Chiara Barbieri<sup>17</sup>, Giulia Jole Burastero<sup>8</sup>, Angelo Pan<sup>18</sup>, Walter Inojosa<sup>19</sup>, Raffaele Scala<sup>20</sup>, Cecilia Burattini<sup>21</sup>, Fabrizio Luppi<sup>22</sup>, Mauro Codeluppi<sup>23</sup>, Kamal Eldin Tarek<sup>24</sup>, Giovanni Cenderello<sup>25</sup>, Mario Salio<sup>26</sup>, Giuseppe Foti<sup>27</sup>, Roberto Dongilli<sup>28</sup>, Gianluigi Bajocchi<sup>1</sup>, Emanuele Alberto Negri<sup>29</sup>, Giacomo Ciusa<sup>3,8</sup>, Giacomo Fornaro<sup>6</sup>, Ilaria Bassi<sup>7</sup>, Lorenzo Zammarchi<sup>14,15</sup>, Teresita Aloè<sup>16</sup> and Nicola Facciolongo<sup>17</sup>

<sup>1</sup>SOC Reumatologia, Azienda USL-IRCCS, Reggio Emilia, Italy. <sup>2</sup>Unità di Reumatologia, Università degli Studi di Modena e Reggio Emilia, Modena, Italy. <sup>3</sup>SOC Malattie Infettive, Azienda USL-IRCCS, Reggio Emilia, Italy. <sup>4</sup>Direzione Scientifica, Azienda USL-IRCCS, Reggio Emilia, Italy. <sup>5</sup>SOC Infrastruttura Ricerca e Statistica, Azienda USL-IRCCS, Reggio Emilia, Italy. <sup>6</sup>Unità Operativa di Malattie Infettive, IRCCS Policlinico S. Orsola-Malpighi, Dipartimento Scienze Mediche e Chirurgiche, Alma Mater Studiorum Università di Bologna, Bologna, Italy. <sup>7</sup>SOC Pneumologia e Terapia Intensiva Respiratoria, IRCCS Policlinico S. Orsola-Malpighi, Dipartimento di Medicina Specialistica, Diagnostica e Sperimentale, Alma Mater Studiorum Università di Bologna, Bologna, Italy. <sup>8</sup>Unità di Malattie Infettive, Dipartimento Chirurgico, Medico, Odontoiatrico e di Scienze Morfologiche, Università di Modena e Reggio Emilia, Modena, Italy. <sup>9</sup>Unità di Epidemiologia Clinica, IRCCS Ospedale Policlinico San Martino, Genova, Italy. <sup>10</sup>SOC Farmacia, Azienda USL-IRCCS, Reggio Emilia, Italy. <sup>11</sup>Servizio Assistenza Territoriale, Direzione Generale Sanità e Politiche Sociali, Regione Emilia-Romagna, Bologna, Italy. <sup>12</sup>Unità per il coinvolgimento dei pazienti nei processi di ricerca, Azienda USL-IRCCS, Reggio Emilia, Italy. <sup>13</sup>Direttore Presidio Ospedaliero, Azienda USL-IRCCS, Reggio Emilia, Italy. <sup>14</sup>SOD Malattie Infettive e Tropicali, AOU Careggi, Firenze, Italy. <sup>15</sup>Dipartimento di Medicina Sperimentale e Clinica, Università degli Studi di Firenze, Firenze, Italy. <sup>16</sup>UOC Pneumologia Interventistica, IRCCS Ospedale Policlinico San Martino, Genova, Italy. <sup>17</sup>SOC Pneumologia, Azienda USL-IRCCS, Reggio Emilia, Italy. <sup>18</sup>Unità di Malattie Infettive, ASST di Cremona, Cremona, Italy. <sup>19</sup>Unità Operativa di Malattie Infettive di Treviso, AULSS2, Treviso, Italy. <sup>20</sup>UOC Pneumologia e UTIP, Ospedale San Donato, Arezzo, Italy. <sup>21</sup>UOC Pneumologia e UTIR, Ospedale Guglielmo da Saliceto, Piacenza, Italy. <sup>22</sup>Clinica Pneumologica, Università di Milano-Bicocca, Ospedale San Gerardo, Monza, Italy. <sup>23</sup>UOC Malattie Infettive, Ospedale Guglielmo da Saliceto, Piacenza, Italy. <sup>24</sup>SC Malattie Infettive, Azienda Socio-Sanitaria 5, La Spezia, Italy. <sup>25</sup>SC Malattie Infettive, ASL1 Imperiese, Sanremo, Italy. <sup>26</sup>SC Malattie dell'Apparato Respiratorio, AO SS Antonio e Biagio e C. Arrigo, Alessandria, Italy. <sup>27</sup>Dipartimento di Anestesia e Terapia Intensiva, Università di Milano-Bicocca, Ospedale San Gerardo, Monza, Italy. <sup>28</sup>Divisione di Pneumologia e Terapia Subintensiva Respiratoria, Ospedale di Bolzano, Bolzano, Italy. <sup>29</sup>SOC Alta Intensità di Cure, Azienda USL-IRCCS, Reggio Emilia, Italy. <sup>30</sup>Co-first authors: C. Salvarani and M. Massari contributed equally to this article.

Corresponding author: Carlo Salvarani (carlo.salvarani@ausl.re.it)

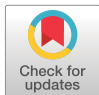

Shareable abstract (@ERSpublications)

**The quick and strong anti-inflammatory effect of pulse glucocorticoid therapy seems to be of no benefit in COVID-19 pneumonia** <https://bit.ly/3lkUmSn>

**Cite this article as:** Salvarani C, Massari M, Costantini M, *et al.* Intravenous methylprednisolone pulses in hospitalised patients with severe COVID-19 pneumonia: a double-blind, randomised, placebo-controlled trial. *Eur Respir J* 2022; 60: 2200025 [DOI: 10.1183/13993003.00025-2022].

This single-page version can be shared freely online.

## Abstract

**Rationale** Pulse glucocorticoid therapy is used in hyperinflammation related to coronavirus disease 2019 (COVID-19). We evaluated the efficacy and safety of pulse intravenous methylprednisolone in addition to standard treatment in COVID-19 pneumonia.

Copyright ©The authors 2022.

This version is distributed under the terms of the Creative Commons Attribution Non-

Commercial Licence 4.0. For commercial reproduction rights and permissions contact [permissions@ersnet.org](mailto:permissions@ersnet.org)

This article has an editorial commentary:  
<https://doi.org/10.1183/13993003.01220-2022>

Received: 5 Jan 2022  
Accepted: 8 March 2022

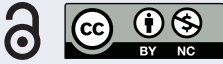

**Methods** In this multicentre, randomised, double-blind, placebo-controlled trial, 304 hospitalised patients with COVID-19 pneumonia were randomised to receive 1 g of methylprednisolone intravenously for three consecutive days or placebo in addition to standard dexamethasone. The primary outcome was the duration of patient hospitalisation, calculated as the time interval between randomisation and hospital discharge without the need for supplementary oxygen. The key secondary outcomes were survival free from invasive ventilation with orotracheal intubation and overall survival.

**Results** Overall, 112 (75.4%) out of 151 patients in the pulse methylprednisolone arm and 111 (75.2%) of 150 in the placebo arm were discharged from hospital without oxygen within 30 days from randomisation. Median time to discharge was similar in both groups (15 days, 95% CI 13.0–17.0 days and 16 days, 95% CI 13.8–18.2 days, respectively; hazard ratio (HR) 0.92, 95% CI 0.71–1.20;  $p=0.528$ ). No significant differences between pulse methylprednisolone and placebo arms were observed in terms of admission to intensive care unit with orotracheal intubation or death (20.0% versus 16.1%; HR 1.26, 95% CI 0.74–2.16;  $p=0.176$ ) or overall mortality (10.0% versus 12.2%; HR 0.83, 95% CI 0.42–1.64;  $p=0.584$ ). Serious adverse events occurred with similar frequency in the two groups.

**Conclusions** Methylprednisolone pulse therapy added to dexamethasone was not of benefit in patients with COVID-19 pneumonia.
