# Supplementary material for: Intravenous methylprednisolone pulses in hospitalised patients with severe COVID-19 pneumonia: a double-blind, randomised, placebo-controlled trial
Source: PubMed Central journal article supplement — Eur Respir J. 2022 Oct 20;60(4):2200025. doi: 10.1183/13993003.00025-2022 (PMC8971731; doi:10.1183/13993003.00025-2022), 2022-10-20
Supplement: ERJ-00025-2022.SUPPLEMENT.pdf [file ERJ-00025-2022.SUPPLEMENT.pdf]

# Supplementary appendix

This appendix has been provided by the authors to give readers additional information about their work.

**Supplement to:** Carlo Salvarani, Marco Massari, Massimo Costantini, et al. Intravenous methylprednisolone pulses in hospitalized patients with severe COVID-19 pneumonia

## **Table of contents:**

1. THE RCT-MP-COVID-19 STUDY GROUP

2. ADDITIONAL DETAIL ON METHODS

3. POPULATIONS IN STUDY

4. ADDITIONAL DETAIL ON RESULTS

4.1 Other data about safety

Table S1: Adverse Events by MedDRA system organ class in the Safety Population (no.=297)

Table S2: Summary of Serious Adverse Events (SAEs)

4.2 Subgroup analyses

Table S3: Clinical outcomes at 30 days according to PaO<sub>2</sub>/FiO<sub>2</sub> at randomisation

Table S4: Clinical outcomes at 30 days according the modality of oxygen administration at randomisation

Table S5: Clinical outcomes at 30 days according to C-reactive protein (CPR) at randomisation

## 1. THE RCT-MP-COVID-19 STUDY GROUP

(The list was ordered by number of patients enrolled)

The following institutions were involved in this study. For each institution the study group members involved with the design and implementation of the study are reported.

Azienda USL -IRCCS di Reggio Emilia:

- Malattie Infettive: Marco Massari, Fabio Sampaolesi, Romina Corsini
- Pneumologia: Nicola Facciolongo, Chiara Barbieri; Francesco Menzella; Matteo Fontana, Silvia Capobelli.
- Reumatologia: Carlo Salvarani, Maria Grazia Catanoso, Gianluigi Bajocchi
- Direzione Scientifica: Massimo Costantini, Franco Merlo, Gabriella Mariani, Luisa Savoldi, Francesca Franzoni, Silvio Cavuto.
- Unità per il coinvolgimento dei pazienti nei processi di ricerca: Chiara Barbieri
- Farmacia: Caterina Turrà, Anna Maria Valcavi.
- Alta Intensità di Cure: Emanuele Alberto Negri
- Direzione Sanitaria: Giorgio Mazzi

Regione Emilia Romagna: Anna Maria Marata

IRCCS Policlinico S. Orsola-Malpighi, Alma Mater Studiorum Università di Bologna

- Malattie Infettive: Pierluigi Viale, Fabio Trapani, Giacomo Fornaro
- Pneumologia e Terapia Intensiva Respiratoria: Stefano Nava, Ilaria Bassi, Federico Tagariello

Azienda Ospedaliera Universitaria di Careggi, Firenze

- Malattie Infettive e Tropicali: Alessandro Bartoloni, Lorenzo Zammarchi, Beatrice Borchì, Lucia Graziani, Michele Spinicci, Jessica Mencarini, Marta Tilli, Iacopo Vellere
- Farmacia: Michele Cecchi, Manuela Angileri.

#### IRCCS Ospedale Policlinico San Martino Genova

- Pneumologia interventistica: Emanuela Barisione, Teresita Aloè
- Area Medica Critica: Eleonora Arboscello, Paola Pitto, Caterina Passalia
- Medicina e Chirurgia di accettazione e di urgenza: Paolo Barbera.
- Farmacia: Sabrina Beltramini, Federica Mina
- Epidemiologia Clinica: Luca Boni, Paolo Bruzzi

#### ASST di Cremona

- Malattie Infettive: Angelo Pan

#### Azienda Ospedaliera Universitaria, Policlinico di Modena

- Malattie Infettive: Giovanni Guaraldi, Giovanni Dolci, Giulia Jole Burastero, Giacomo Ciusa, Jovana Milic, Marianna Ravasi

#### Ospedale di Treviso

- Malattie Infettive: Walter Inojosa, Piergiorgio Scotton

#### Ospedale San Donato Arezzo

- Pneumologia: Raffaele Scala, Luca Guidelli, Marco Ferri, Marusca Mazzetti
- Farmacia ospedaliera: Daniela Morisciano, Romina Castellani

#### Ospedale Guglielmo da Saliceto di Piacenza

- Pneumologia: Cecilia Burattini, Franco Cosimo, Ielpo Antonella
- Malattie Infettive: Mauro Codeluppi, Maria Cristina Leoni, Laura Gerna, Alberto Catania, Annalisa Mancini.

#### Ospedale San Gerardo, Monza

- Pneumologia: Fabrizio Luppi, Francesco Ammatuna, Sara Busnelli.
- Terapia Intensiva: Giuseppe Foti, Beatrice Vergnano, Emanuele Rezoagli, Annalisa Benini, Roberto Rona, Ilaria Mariani
- Farmacia: Dario Cerri, Cristina Zanini.

#### ASL1 Imperiese, Sanremo

- Malattie Infettive: Giovanni Cenderello, Tita Farinella Sara, Sciolè Katiusha, Nicola Forni
- Laboratorio Analisi: Domenico Marra
- Farmacia: Silvia Di Francesco, Roberta Mazzocchi

#### Azienda Socio-Sanitaria 5, La Spezia

- Malattie Infettive: Kamal Eldin Tarek, Stefania Artioli, Meazza Massimiliano

#### Azienda Ospedaliera S. Antonio e Biagio e C. Arrigo di Alessandria

- Pneumologia: Mario Salio, Giulia Salomoni, Federica Arcadipane
- Infrastruttura ricerca, formazione e innovazione: Serena Penpa, Antonio Maconi
- Farmacia: Francesca Cammalleri

#### Ospedale di Bolzano

- Malattie Infettive: Greta Spoladore, Raffaella Binazzi
- Servizio Farmaceutico: Marta Mazzer, Paola Cristina Cappelletto.

## **2. ADDITIONAL DETAILS ON METHODS**

The trial was designed between September and October 2021, by a multidisciplinary group at the Azienda USL-IRCCS of Reggio Emilia. The group included clinical specialists in Infectious Diseases (Marco Massari), Rheumatology (Carlo Salvarani), Respiratory Disease (Nicola Facciolongo), Pharmacology (Caterina Turrà), a group of statisticians (Silvio Cavuto, Luisa Savoldi) and clinical epidemiologists (Domenico Franco Merlo, Paolo Bruzzi and Massimo Costantini).

No funding was obtained for this study. The coordinator centre and all participating centres are using local resources to conduct the trial.

CS, MC, FM, PB, GM drafted the first version of the manuscript. A second revision of the manuscript was performed by PV, SN, GD. PB, LB, MC, FM contributed to the statistical section of the manuscript. CT revised the pharmacological section. The manuscript was revised and approved by all the authors, who agreed the submission for publication.

### 3. POPULATIONS IN STUDY

#### 3.1. Randomised patients: 304

#### 3.2. Population for Intention To Treat (ITT) analysis: 301

Three patients withdrew consent to the study during the first day after randomisation:

| <b>ID-code</b> | <b>Arm</b>   | <b>comments</b>                            |
|----------------|--------------|--------------------------------------------|
| 017-123        | Standard     | withdrew consent 1 day after randomization |
| 016-150        | Standard     | withdrew consent 1 day after randomization |
| 001-300        | Experimental | withdrew consent 1 day after randomization |

#### 3.3. Population for safety analyses: 298

| <b>ID-code</b> | <b>Arm</b>   | <b>comments</b>           |
|----------------|--------------|---------------------------|
| 003-036        | Standard     | No experimental treatment |
| 008-101        | Experimental | No experimental treatment |
| 016-150        | Standard     | Withdrew consent          |
| 012-206        | Standard     | No experimental treatment |
| 017-251        | Experimental | No experimental treatment |
| 001-300        | Experimental | Withdrew consent          |

**Note:** 1 patient (code 017-123) withdrew consent after one bolus and was included in the safety analysis until this date.

## 4. ADDITIONAL DETAILS ON RESULTS

### Other data about safety

Table S1. Adverse Events by MedDRA system organ class in the Safety Population (no.=298)

| <i>MedDRA system organ class</i>                     | Adverse Events (no.) |          |            |              |                       |          |   |              |
|------------------------------------------------------|----------------------|----------|------------|--------------|-----------------------|----------|---|--------------|
|                                                      | Placebo + Standard   |          |            |              | MTP pulses + Standard |          |   |              |
|                                                      | <i>Grades *</i>      |          |            | <i>Total</i> | <i>Grades *</i>       |          |   | <i>Total</i> |
| <i>1-2</i>                                           | <i>3-4</i>           | <i>5</i> | <i>1-2</i> |              | <i>3-4</i>            | <i>5</i> |   |              |
| Accidents and injuries (SMQ)                         | 1                    | 0        | 0          | 1            | 0                     | 0        | 0 | 0            |
| Blood and lymphatic system disorders                 | 0                    | 0        | 0          | 0            | 1                     | 1        | 0 | 2            |
| Breast disorders                                     | 0                    | 0        | 0          | 0            | 1                     | 0        | 0 | 1            |
| Cardiac disorders                                    | 2                    | 1        | 0          | 3            | 2                     | 3        | 0 | 5            |
| Endocrine disorders                                  | 0                    | 0        | 0          | 0            | 1                     | 0        | 0 | 1            |
| Gastrointestinal disorders                           | 2                    | 1        | 0          | 3            | 3                     | 1        | 1 | 5            |
| Gastrointestinal haemorrhage                         | 0                    | 1        | 0          | 1            | 0                     | 0        | 0 | 0            |
| General disorders and administration site conditions | 7                    | 1        | 0          | 8            | 2                     | 6        | 0 | 8            |
| General system disorders NEC                         | 1                    | 0        | 0          | 1            | 0                     | 0        | 0 | 0            |
| Infections and infestations                          | 5                    | 3        | 4          | 12           | 6                     | 5        | 0 | 11           |
| Investigations                                       | 2                    | 3        | 0          | 5            | 1                     | 0        | 0 | 1            |
| Metabolism and nutrition disorders                   | 17                   | 6        | 0          | 23           | 22                    | 8        | 1 | 31           |
| Musculoskeletal and connective tissue disorders      | 3                    | 0        | 0          | 3            | 1                     | 0        | 0 | 1            |
| Psychiatric disorders                                | 2                    | 2        | 0          | 4            | 2                     | 2        | 0 | 4            |
| Renal and urinary disorders                          | 4                    | 2        | 0          | 6            | 1                     | 3        | 0 | 4            |
| Respiratory, thoracic, and mediastinal disorders     | 2                    | 5        | 1          | 8            | 4                     | 5        | 0 | 9            |
| Skin and subcutaneous tissue disorders               | 1                    | 0        | 0          | 1            | 1                     | 0        | 0 | 1            |
| Surgical and medical procedures                      | 0                    | 1        | 1          | 2            | 0                     | 0        | 1 | 1            |
| Vascular disorders                                   | 2                    | 2        | 1          | 5            | 4                     | 1        | 0 | 5            |
| <b>Total</b>                                         | 51                   | 28       | 7          | 86           | 52                    | 35       | 3 | 90           |

\* Grade AEs: 1 = Mild; 2 = Moderate, 3 = Severe; 4 = Life-Threatening; 5 = Death

Table S2. Summary of Serious Adverse Events (SAEs)

| ID - Centre                  | MedDRA SOC term                                             | MedDRA SOC code | MedDRA PT term                     | MedDRA PT code | Seriousness      | Grade * | Related | Interval onset /outcome (days) | Outcome      |
|------------------------------|-------------------------------------------------------------|-----------------|------------------------------------|----------------|------------------|---------|---------|--------------------------------|--------------|
| <b>Placebo + standard</b>    |                                                             |                 |                                    |                |                  |         |         |                                |              |
| 271-011                      | <b>Gastrointestinal haemorrhage</b>                         | 10017955        | Gastrointestinal disorders         | 10017947       | Important event  | 4       | Yes     |                                | Unknown      |
| 063-004                      | <b>General disorders and administration site conditions</b> | 10018065        | Pyrexia                            | 10037660       | Important event  | 2       | No      | 1                              | Resolved     |
| 021-003                      | <b>Infections and infestations</b>                          | 10021881        | Septic shock                       | 10040070       | Life threatening | 5       | No      | 6                              | Fatal        |
| 035-004                      |                                                             |                 | Lung abscess                       | 10025028       | Hospitalisation  | 4       | Yes     |                                | Unknown      |
| 049-001                      |                                                             |                 | Enterococcal infection             | 10061124       | Important event  | 3       | No      | 20                             | Resolved     |
| 286-017                      |                                                             |                 | Staphylococcal infection           | 10058080       | Death            | 5       | Yes     | 12                             | Fatal        |
| 286-017                      |                                                             |                 | Pneumonia klebsiella               | 10035717       | Death            | 5       | No      | 12                             | Fatal        |
| 286-017                      |                                                             |                 | Candida infection                  | 10074170       | Death            | 5       | No      | 6                              | Fatal        |
| 042-004                      | <b>Renal and urinary disorders</b>                          | 10038359        | Renal failure                      | 10038435       | Important event  | 3       | No      |                                | Unknown      |
| 035-004                      | <b>Respiratory, thoracic and mediastinal disorders</b>      | 10038738        | Pneumothorax                       | 10035759       | Important event  | 3       | No      | 3                              | Resolved     |
| 042-004                      |                                                             |                 | Pneumothorax                       | 10035759       | Hospitalisation  | 3       | No      | 5                              | Resolved     |
| 071-006                      |                                                             |                 | Pneumonia aspiration               | 10035669       | Life threatening | 5       | No      | 21                             | Fatal        |
| 130-008                      | <b>Surgical and medical procedures</b>                      | 10042613        | Endotracheal intubation            | 10067450       | Life threatening | 4       | No      |                                | Unknown      |
| 293-008                      |                                                             |                 | Endotracheal intubation            | 10067450       | Death            | 5       | No      | 9                              | Fatal        |
| 105-013                      | <b>Vascular disorders</b>                                   | 10047065        | Cerebral haemorrhage               | 10008111       | Life threatening | 5       | No      | 1                              | Fatal        |
| 166-001                      |                                                             |                 | Cerebral haemorrhage               | 10008111       | Hospitalisation  | 3       | No      | 16                             | Resolved     |
| <b>MTP pulses + Standard</b> |                                                             |                 |                                    |                |                  |         |         |                                |              |
| 209-013                      | <b>Cardiac disorders</b>                                    | 10007541        | Cardiac failure                    | 10007554       | Important event  | 3       | No      |                                | Improved     |
| 085-001                      | <b>Gastrointestinal disorders</b>                           | 10017947        | Haemorrhagic necrotic pancreatitis | 10076058       | Life threatening | 5       | No      | 7                              | Fatal        |
| 024-001                      | <b>Infections and infestations</b>                          | 10021881        | Pseudomonas infection              | 10061471       | Important event  | 3       | No      | 10                             | Resolved     |
| 245-001                      |                                                             |                 | Escherichia sepsis                 | 10015296       | Important event  | 3       | No      | 13                             | Resolved     |
| 250-020                      |                                                             |                 | Septic shock                       | 10040070       | Important event  | 3       | Yes     |                                | Improved     |
| 012-003                      | <b>Respiratory, thoracic and mediastinal disorders</b>      | 10038738        | Pneumonia bacterial                | 10060946       | Life threatening | 4       | No      |                                | Improved     |
| 250-020                      |                                                             |                 | Pneumonia bacterial                | 10060946       | Important event  | 3       | Yes     |                                | Improved     |
| 278-008                      | <b>Surgical and medical procedures</b>                      | 10042613        | Endotracheal intubation            | 10067450       | Life threatening | 5       | No      | 9                              | Fatal        |
| 077-005                      | <b>Vascular disorders</b>                                   | 10047065        | Cerebral ischaemia                 | 10008120       | Disability       | 4       | No      |                                | Ong./Worsen. |

\* Grade: 1 = Lightweight; 2 = Moderate, 3 = Severe; 4 = Very Severe; 5 = Death

## 5. Subgroup analyses

In these subgroup analyses Hazard ratios (HRs) estimates obtained in the Cox model were reported within each subgroup, while the presence of a significant variation of the HRs across strata of each factor was assessed by means of the appropriate treatment-by-factor interaction tests. The P values of the interaction tests are reported, but should be considered with caution, due to the lack of correction for multiplicity.

Table S3: Clinical outcomes at 30 days according to PaO<sub>2</sub>/FiO<sub>2</sub> at randomisation

Strata:

- PaO<sub>2</sub>/FiO<sub>2</sub>, between 100 and 200 (no.=143)
- PaO<sub>2</sub>/FiO<sub>2</sub>, between 201 and 300 (no.=158)

|                                                                 | Placebo +<br>Standard<br>no. (% at 30 dd) | MTP pulses +<br>Standard<br>no. (% at 30 dd) | Rate Ratio<br>(95% CI) |
|-----------------------------------------------------------------|-------------------------------------------|----------------------------------------------|------------------------|
| <b>PaO<sub>2</sub>/FiO<sub>2</sub>,<br/>between 100 and 200</b> |                                           |                                              |                        |
| Discharge without oxygen                                        | 51/73 (70.7)                              | 45/70 (66.7)                                 | 0.71 (0.48-1.08)       |
| Admission to ICU or death                                       | 17/73 (23.4)                              | 18/70 (25.7)                                 | 1.14 (0.59-2.21)       |
| Deaths                                                          | 12/73 (16.5)                              | 9/70 (12.9)                                  | 0.77 (0.32-1.83)       |
| <b>PaO<sub>2</sub>/FiO<sub>2</sub>,<br/>between 201 and 300</b> |                                           |                                              |                        |
| Discharge without oxygen                                        | 60/77 (79.5)                              | 67/81 (82.9)                                 | 1.16 (0.82-1.65)       |
| Admission to ICU or death                                       | 7/77 (9.1)                                | 11/81 (13.7)                                 | 1.50 (0.58-3.88)       |
| Deaths                                                          | 6/77 (8.1)                                | 5/81 (6.3)                                   | 0.79 (0.24-2.59)       |

Tests for interaction for discharge without oxygen (P=0.083), admission to ICU or death (P=0.522), deaths (P=0.758).

Table S4: Clinical outcomes at 30 days according to the modality of oxygen administration at randomisation

Strata:

- Supplemental standard oxygen (no. 205)
- NIV or high-flow oxygen (no.=96)

|                                | <b>Placebo +<br/>Standard<br/>no. (% at 30 dd)</b> | <b>MTP pulses +<br/>Standard<br/>no. (% at 30 dd)</b> | <b>Rate Ratio<br/>(95% CI)</b> |
|--------------------------------|----------------------------------------------------|-------------------------------------------------------|--------------------------------|
| <b>Standard oxygen</b>         |                                                    |                                                       |                                |
| Discharge without oxygen       | 79/101 (79.6)                                      | 84/104 (81.1)                                         | 0.93 (0.68-1.26)               |
| Admission to ICU or death      | 12/101 (12.0)                                      | 14/104 (13.5)                                         | 1.15 (0.53-2.48)               |
| Deaths                         | 9/101 (9.1)                                        | 7/104 (6.9)                                           | 0.75 (0.28-2.01)               |
| <b>NIV or high-flow oxygen</b> |                                                    |                                                       |                                |
| Discharge without oxygen       | 32/49 (66.3)                                       | 28/47 (62.0)                                          | 0.86 (0.52-1.43)               |
| Admission to ICU or death      | 12/49 (24.6)                                       | 15/47 (31.9)                                          | 1.33 (0.62-2.85)               |
| Deaths                         | 9/49 (18.6)                                        | 7/47 (14.9)                                           | 0.82 (0.31-2.20)               |

Tests for interaction for discharge without oxygen (P=0.822), admission to ICU or death (P=0.885), deaths (P=0.932).

Table S5: Clinical outcomes at 30 days according to C-reactive protein (CPR) at randomisation

Strata:

- CPR greater than 5 and less or equal 10 (no. 137)
- CPR greater than 10 and less or equal 15 (no. 93)
- CPR greater than 15 (no.=71)

|                             | Placebo +<br>Standard<br>no. (% at 30 dd) | MTP pulses +<br>Standard<br>no. (% at 30 dd) | Rate Ratio<br>(95% CI) |
|-----------------------------|-------------------------------------------|----------------------------------------------|------------------------|
| <b>CPR &gt; 5 and ≤ 10</b>  |                                           |                                              |                        |
| Discharge without oxygen    | 55/68 (82.2)                              | 52/69 (75.4)                                 | 0.73 (0.50-1.07)       |
| Admission to ICU or death   | 6/68 (8.9)                                | 13/69 (19.0)                                 | 2.29 (0.87-6.03)       |
| Deaths                      | 5/68 (7.5)                                | 8/69 (11.8)                                  | 1.61 (0.53-4.93)       |
| <b>CPR &gt; 10 and ≤ 15</b> |                                           |                                              |                        |
| Discharge without oxygen    | 31/46 (67.8)                              | 34/47 (75.0)                                 | 1.14 (0.70-1.86)       |
| Admission to ICU or death   | 11/46 (23.9)                              | 8/47 (17.1)                                  | 0.68 (0.27-1.70)       |
| Deaths                      | 8/46 (17.4)                               | 1/47 (2.3)                                   | 0.12 (0.01-0.93)       |
| <b>CPR &gt; 15</b>          |                                           |                                              |                        |
| Discharge without oxygen    | 25/36 (71.2)                              | 26/35 (75.9)                                 | 1.07 (0.62-1.85)       |
| Admission to ICU or death   | 7/36 (19.8)                               | 8/35 (22.9)                                  | 1.22 (0.44-3.36)       |
| Deaths                      | 5/36 (14.5)                               | 5/35 (14.3)                                  | 1.04 (0.30-3.60)       |

Tests for interaction for discharge without oxygen (P=0.276), admission to ICU or death (P=0.145), deaths (P=0.021).

Table S6: Clinical outcomes at 30 days according to the age at randomisation

Strata:

- Age (years) ≤ 60 (no. 120)
- Age (years) > 60 (no. 181)

|                            | <b>Placebo +<br/>Standard<br/>no. (% at 30 dd)</b> | <b>MTP pulses +<br/>Standard<br/>no. (% at 30 dd)</b> | <b>Rate Ratio<br/>(95% CI)</b> |
|----------------------------|----------------------------------------------------|-------------------------------------------------------|--------------------------------|
| <b>Age (years) ≤ 60</b>    |                                                    |                                                       |                                |
| Discharge without oxygen   | 57/59 (96.6)                                       | 57/61 (93.4)                                          | 0.78 (0.54-1.13)               |
| Admission to ICU or death  | 2/59 (3.4)                                         | 3/61 (4.9)                                            | 1.46 (0.24-8.77)               |
| Deaths                     | 2/59 (3.4)                                         | 0/61 (-)                                              | 0.19 (0.01-4.28)               |
| <b>Age (years) &gt; 60</b> |                                                    |                                                       |                                |
| Discharge without oxygen   | 54/91 (59.3)                                       | 55/90 (61.1)                                          | 0.97 (0.66-1.41)               |
| Admission to ICU or death  | 22/91 (24.2)                                       | 27/90 (30.0)                                          | 1.27 (0.73-2.24)               |
| Deaths                     | 16/91 (17.6)                                       | 15/90 (16.7)                                          | 0.97 (0.47-1.97)               |

Tests for interaction for discharge without oxygen (P=0.435), admission to ICU or death (P=0.884), deaths (P=0.054).

Table S7: Clinical outcomes at 30 days according to Body Mass Index at randomisation

Strata:

- BMI 1<sup>st</sup> quartile, ≤ 24,6 (no.=58)
- BMI 2<sup>nd</sup> quartile, 24,7-27.6 (no.=59)
- BMI 3<sup>rd</sup> quartile, 27.7- 30.9 (no.=58)
- BMI 4<sup>th</sup> quartile, ≥ 31.0 (no.=58)

|                                    | Placebo +<br>Standard<br>no. (% at 30 dd) | MTP pulses +<br>Standard<br>no. (% at 30 dd) | Rate Ratio<br>(95% CI) |
|------------------------------------|-------------------------------------------|----------------------------------------------|------------------------|
| <b>BMI 1<sup>st</sup> quartile</b> |                                           |                                              |                        |
| Discharge without oxygen           | 17/31 (54.8)                              | 19/27 (70.4)                                 | 1.36 (0.71-2.62)       |
| Admission to ICU or death          | 8/31 (25.8)                               | 7/27 (25.9)                                  | 0.98 (0.36-2.71)       |
| Deaths                             | 7/31 (22.6)                               | 2/27 (7.4)                                   | 0.37 (0.08-1.72)       |
| <b>BMI 2<sup>nd</sup> quartile</b> |                                           |                                              |                        |
| Discharge without oxygen           | 15/23 (65.2)                              | 26/36 (72.2)                                 | 1.01 (0.53-1.90)       |
| Admission to ICU or death          | 6/23 (26.1)                               | 7/36 (19.4)                                  | 0.74 (0.25-2.22)       |
| Deaths                             | 5/23 (21.7)                               | 4/36 (11.1)                                  | 0.50 (0.13-1.91)       |
| <b>BMI 3<sup>rd</sup> quartile</b> |                                           |                                              |                        |
| Discharge without oxygen           | 22/29 (75.9)                              | 22/29 (75.9)                                 | 0.88 (0.49-1.59)       |
| Admission to ICU or death          | 5/29 (17.2)                               | 4/29 (13.8)                                  | 0.78 (0.21-2.91)       |
| Deaths                             | 3/29 (10.3)                               | 2/29 (6.9)                                   | 0.68 (0.12-3.94)       |
| <b>BMI 4<sup>th</sup> quartile</b> |                                           |                                              |                        |
| Discharge without oxygen           | 25/29 (86.2)                              | 22/29 (75.9)                                 | 0.76 (0.43-1.35)       |
| Admission to ICU or death          | 2/29 (6.9)                                | 5/29 (17.2)                                  | 2.68 (0.52-13.8)       |
| Deaths                             | 0/29 (-)                                  | 2/29 (6.9)                                   | 5.19 (0.20-136)        |

Tests for interaction for discharge without oxygen (P=0.6071), admission to ICU or death (P=0.581), deaths (P=0.046).
